# Supplementary material for: Toxicogenomic and Phenotypic Analyses of Bisphenol-A Early-Life Exposure Toxicity in Zebrafish
Source: PubMed Central journal article supplement (PMC3237442; doi:10.1371/journal.pone.0028273), 2011-12-14
Supplement: pone.0028273.s003.pdf [file pone.0028273.s003.pdf]

**Table S1.** Information of zebrafish transgenic lines used in present study.

| <b>Transgenic line<br/>[Description of green<br/>fluorescence protein<br/>expression]</b> | <b>Description of green fluorescence<br/>protein expression</b> | <b>Reference</b>                                                                                                                                                                                    |
|-------------------------------------------------------------------------------------------|-----------------------------------------------------------------|-----------------------------------------------------------------------------------------------------------------------------------------------------------------------------------------------------|
| <b>Tg(flia:EGFP)</b>                                                                      | Blood circulatory system                                        | Lawson ND, Weinstein BM. (2002). In vivo imaging of embryonic vascular development using transgenic zebrafish. <i>Dev Biol.</i> 248(2):307-18.                                                      |
| <b>Tg(nkx2.2a:mEGFP)</b>                                                                  | Axon, motor neuron, myelin assembly,<br>Schwann cell            | Kucenas S, Snell H, Appel B. (2008). nkx2.2a promotes specification and differentiation of a myelinating subset of oligodendrocyte lineage cells in zebrafish. <i>Neuron Glia Biol.</i> 4(2):71-81. |
| <b>ET(krt8:EGFP)sqet20<br/>(Enhancer Trap 20)</b>                                         | Mantle cells of neuromasts of the lateral<br>line               | Parinov S, Kondrichin I, Korzh V, Emelyanov A. (2004). Tol2 transposon-mediated enhancer trap to identify developmentally regulated zebrafish genes in vivo. <i>Dev. Dynam</i> , 231:449-459.       |
