# Supplementary material for: Toxicogenomic and Phenotypic Analyses of Bisphenol-A Early-Life Exposure Toxicity in Zebrafish
Source: PubMed Central journal article supplement (PMC3237442; doi:10.1371/journal.pone.0028273), 2011-12-14
Supplement: pone.0028273.s004.pdf [file pone.0028273.s004.pdf]

**Table S2.** Selected top functional subcategories of 'Molecular and cellular function' that are significantly enriched with human homologs of zebrafish genes deregulated by 500 µg/L, 1500 µg/L and 4500 µg/L of BPA. The data was generated using Ingenuity Pathway Analysis™ software and only subcategories with  $P < 0.05$  (Fisher's Exact Test) and having greater than 5% of homologs enriched in all three treatment groups are listed.

| Functional Subcategories | Percentage (no. molecules enriched / no. molecules used in analysis) | Molecules (human homologs of zebrafish genes) used in the analysis                                                                                                                                                                                                                                                                                                                                                                            |
|--------------------------|----------------------------------------------------------------------|-----------------------------------------------------------------------------------------------------------------------------------------------------------------------------------------------------------------------------------------------------------------------------------------------------------------------------------------------------------------------------------------------------------------------------------------------|
| <b>Cell Death</b>        |                                                                      |                                                                                                                                                                                                                                                                                                                                                                                                                                               |
| BPA_500µg                | 39.6%<br>(40/101)                                                    | BLNK,SRPX,PA2G4,AXIN1,BDNF,FGF8,FIP1L1,MYH11,CD74,SCYE1,TGM2,MYLK,CSNK1E,PHOX2A,HK1,CASP6,CD2AP,EGR2,CAMK2D,PARK7,PIK3CG,ZHX2,TTC5,PPP3CA,RUNX3,E2F4,TJP2,NDRG1,FEM1B,IFT57,DPF2,GABBR1,CDH2,C68,GAB1,RND3,SYK,RHOA,GABPA,SPO11                                                                                                                                                                                                               |
| BPA_1500µg               | 43.5%<br>(73/168)                                                    | AXIN1,PTHLH,CDC7,HRAS,CDK9,SCYE1,LRPAP1,PTK2,CAMK2D,CDK8,EGR2,ZHX2,PIK3CG,PRKAA1,IRS2,CCNL2,E2F4,NDRG1,TFDP1,FEM1B,IFT57,CREBBP,COL2A1,TCF3,RNF17,ACVR1B,PFKM,HSPA8,PRPH2,TGM1,PPP1R13L,GAB1,CDH5,RND3,SYK,RTN4,SPO11,BLNK,POU3F1,APOE,CUL5,SRPX,PPP2R2A,BDNF,PCDH21,HYOU1,FGF8,FIP1L1,CD74,CSNK1E,CASP6,AQP3,HAND2,YES1,AKT1,CLDN4,EFNB1,SORT1,PPP3CA,GALNT10,NUDCD3,GRIN1,KHK,PTP4A2,VP33A,DEDD2,CCDC6,ROCK1,GRAP2,GABPA,HOXB9,CYP2J2,ERCC5 |
| BPA_4500µg               | 28.8%<br>(36/125)                                                    | APOE,APOB,SRPX,PA2G4,AXIN1,HYOU1,CDC7,HRAS,FIP1L1,SETX,MYH11,PTK2,EGR2,PARK7,PTPRO,TGFB2,TTC5,PIK3R2,PPP3CA,ITGB5,CCNL2,PPARD,RPA1,TCF3,ACVR1B,IGF2,TGM1,PPP1R13L,NRCAM,BHLHB2,RTN4,GABPA,CTH,CFLAR,CYR61,TNFRSF19                                                                                                                                                                                                                            |
| <b>Cell Morphology</b>   |                                                                      |                                                                                                                                                                                                                                                                                                                                                                                                                                               |
| BPA_500µg                | 22.7%<br>(18/101)                                                    | NCKIPSD,MYCL1,ZNF384,AXIN1,BDNF,USF2,FGF8,FIP1L1,MYH11,CD74,MYLK,CASP6,CD2AP,BCKDHA,PIK3CG,E2F4,YWHAG,DDEF1,SP4,SEC23A,CDH2,SDCBP,GAB1,RND3,RHOA,SYPL2,GABPA,CPEB1                                                                                                                                                                                                                                                                            |
| BPA_1500µg               | 22.0%<br>(27/168)                                                    | APOE,GEM,MYCL1,ZNF384,BDNF,AXIN1,FGF8,HRAS,FIP1L1,DNAJC3,LRPAP1,FRAG1,COL1A2,PTK2,AQP3,YES1,AKT1,PIK3CG,BCKDHA,EFNB1,ZHX2,DENND2D,E2F4,MLL10,TFDP1,RRAD,CREBBP,SLIT2,RNF17,TCF3,CCDC6,SP4,ROCK1,PPP1R13L,RND3,GAB1,RTN4                                                                                                                                                                                                                       |
| BPA_4500µg               | 27.2%<br>(29/125)                                                    | APOE,GEM,EP8,NCDN,STMN2,ZNF384,AXIN1,EXT1,HRAS,FIP1L1,MYH11,FRAG1,PTK2,EFNB1,TGFB2,GFAP,DENND2D,YWHAG,TFDP1,RRAD,SLIT2,RNF17,TCF3,SP4,ROCK1,SDCBP,PPP1R13L,RND3,NRCAM,RTN4,GABPA,GOLGA5,CYR61,TNFRSF19                                                                                                                                                                                                                                        |

### **Cellular Assembly and Organization**

|            |                   |                                                                                                                                                                                                                            |
|------------|-------------------|----------------------------------------------------------------------------------------------------------------------------------------------------------------------------------------------------------------------------|
| BPA_500µg  | 16.8%<br>(17/101) | NCKIPSD,DDEF1,BDNF,MYH11,ACTG1,SP4,CASP6,CDH2,CD2AP,TIAM2,CLDN4,GAB1,SYK,RHOA,SPO11,PPP3CA,ACTA1                                                                                                                           |
| BPA_1500µg | 21.4%<br>(36/168) | POU3F1,APOE,GEM,NCKIPSD,BDNF,CDC7,PCDH21,RAN,HRAS,POU3F2,LRPAP1,PTK2,DYNC1LI1,YES1,AKT1,EFNB1,GFAP,SORT1,CAV2,PPP3CA,GRIN1,NDRG1,RRAD,COL2A1,EXOC7,SLIT2,ACTG1,SP4,ROCK1,TIAM2,GAB1,NDE1,HELLS,SYK,RTN4,SPO11              |
| BPA_4500µg | 30.4%<br>(38/125) | APOE,MYH6,EP8,GEM,STMN2,DIAPH3,CDC7,RAN,EXT1,HEXA,HRAS,PTK2,PTPRO,EFNB1,MID1IP1,MAP1A,GFAP,SORT1,CAV2,PPP3CA,ITGB5,NDRG1,RRAD,PPARD,RPA1,SLIT2,ACTG1,SP4,ROCK1,NRCAM,HELLS,RTN4,GOLGA5,CAPN2,C10ORF119,CYR61,TNFRSF19,VIL1 |

### **Cellular Movement**

|            |                   |                                                                                                                                                                             |
|------------|-------------------|-----------------------------------------------------------------------------------------------------------------------------------------------------------------------------|
| BPA_500µg  | 22.8%<br>(23/101) | RUNX3,DDEF1,BDNF,RAB35,FGF8,CCNB2,MYH11,SCYE1,TGM2,MYLK,TSPAN3,CDH2,CD2AP,EGR2,SDCBP,TIAM2,RND3,GAB1,CLDN4,PIK3CG,RHOA,SYK,CYSLTR1                                          |
| BPA_1500µg | 17.9%<br>(30/168) | APOE,CUL5,GEM,BDNF,PTHLH,FGF8,HRAS,POU3F2,SCYE1,LRPAP1,FGF13,PTK2,EGR2,AKT1,CLDN4,EFNB1,PIK3CG, SORT1,SERPINA1,MLLT10,SLIT2,TCF3,ROCK1,TIAM2,RND3,CDH5,GAB1,NDE1,SYK,CYP2J2 |
| BPA_4500µg | 19.2%<br>(24/125) | GEM,EP8,HRAS,MYH11,SLIT2,TCF3,ROCK1,PTK2,IGF2,EGR2,SDCBP,RND3,NRCAM,JAM3,PTPRO,EFNB1,TGFB2,CYSLTR1,CAPN2,SERPINA1,PIK3R2,TBXAS1,VIL1,ITGB5                                  |

### **Small Molecule Biochemistry**

|            |                   |                                                                                                                                                                                |
|------------|-------------------|--------------------------------------------------------------------------------------------------------------------------------------------------------------------------------|
| BPA_500µg  | 28.7%<br>(29/101) | SLC27A2,BDNF,USF2,MYLK,TGM2,HK1,PRPS1,CAMK2D,PARK7,PIK3CG,BCKDHA,SLC20A1,AFMID,CHERP,PGM1,GABBR1,SERINC1,SLC34A2,UMPS,EBP,RND3,GAB1,RHOA,SYK,SYPL2,ACAT1,NUCB2,CYSLTR1,SLC27A1 |
| BPA_1500µg | 14.9%<br>(25/168) | APOE,FOXA1,BDNF,PPP1R3C,PTHLH,HRAS,CDK9,LRPAP1,PTK2,AKT1,CDK8,CHIT1,KARS,PRKAA1,IRS2,SERPINA1,NSDHL,RRAD,UPP1,RPIA,PFKM,TGM1,SLC27A1,TBXAS1,NPC2                               |
| BPA_4500µg | 20.8%<br>(26/125) | APOE,APOB,PPP1R3C,PKD2,HRAS,HEXA,ADIPOR1,PTK2,CAMK2D,PARK7,KARS,OXCT1,SERPINA1,GUCA1A,RRAD,PPARD,UPP1,CHERP,PGM1,UMPS,IGF2,TGM1,CYSLTR1,NUCB2,CTH,TBXAS1                       |

### **Cellular Development**

|            |                   |                                                                                                                                                                                                                                          |
|------------|-------------------|------------------------------------------------------------------------------------------------------------------------------------------------------------------------------------------------------------------------------------------|
| BPA_500µg  | 14.9%<br>(15/101) | BLNK,RUNX3,E2F4,CDC2L5,AXIN1,BDNF,FGF8,MYH11,CD74,EGR2,SOX3,RHOA,SYK,PIK3CG,PITX3                                                                                                                                                        |
| BPA_1500µg | 16.1%<br>(27/168) | BLNK,POU3F1,BDNF,AXIN1,PTHLH,FGF8,CDC7,HRAS,DNAJC3,POU3F2,NKX2-3,CD74,PTK2,HAND2,EGR2,AKT1,PIK3CG,IRS2,PPP3CA,DENND2D,E2F4,MLLT10,SLIT2,TCF3,SYK,COL9A2,SPO11                                                                            |
| BPA_4500µg | 32.0%<br>(40/125) | BLNK,MYH6,PA2G4,STMN2,NID2,AXIN1,CDC7,HRAS,SFPQ,EXT1,MYH11,CD74,SPRED2,NID1,PTK2,EGR2,TGFB2,ACADM,ITGB5,DENND2D,YWHAG,NDRG1,STK39,PPARD,MEOX1,SNRK,SLIT2,RNF17,TCF3,ACVR1B,IGF2,PPP1R13L,TGM1,HELLS,BHLHB2,EHMT2,SF3B4,TOX,DYRK1A,FNDC3A |

### **Cell Cycle**

|            |                   |                                                                                                                                                                                                                            |
|------------|-------------------|----------------------------------------------------------------------------------------------------------------------------------------------------------------------------------------------------------------------------|
| BPA_500µg  | 9.9%<br>(10/101)  | BLNK,CD2AP,E2F4,GAB1,MAD2L1BP,RHOA,RAB35,MRE11A,SPO11,SCYE1                                                                                                                                                                |
| BPA_1500µg | 22.0%<br>(37/168) | BLNK,APOE,CUL5,PPP2R2A,PTHLH,RAN,CDC7,FGF8,HRAS,NUP214,CDK9,SCYE1,PTK2,DYNC1LI1,CAMK2D,AKT1,CDK8,MAD2L1BP,IRS2,MAP9,PPP3CA,NUDCD3,E2F4,TFDP1,NDRG1,RRAD,CREBBP,TCF3,ACVR1B,HSPA8,ANAPC4,C10ORF46,GAB1,NDE1,HELLS,SYK,SPO11 |
| BPA_4500µg | 11.2%<br>(14/125) | BLNK,YWHAG,NDRG1,TFDP1,CDC7,RAN,HRAS,RPA1,PTK2,IGF2,HELLS,PTPRO,BHLHB2,CYR61                                                                                                                                               |

### **Gene Expression**

|            |                   |                                                                                                                                                                                  |
|------------|-------------------|----------------------------------------------------------------------------------------------------------------------------------------------------------------------------------|
| BPA_500µg  | 29.7%<br>(30/101) | ECSIT,BLNK,ZNF384,PA2G4,BDNF,AXIN1,USF2,MYH11,SET,CEBPG,CSNK1E,PHOX2A,EGR2,CAMK2D,BCKDHA,ZHX2,SIN3B,TTC5,PPP3CA,SLC20A1,RUNX3,E2F4,SP4,SUPT16H,RHOA,SYK,GABPA,TFB2M,PITX3,DYRK1A |
| BPA_1500µg | 26.7%<br>(28/168) | NR6A1,ZNF384,AXIN1,BDNF,FOXA1,HRAS,POU3F2,CDK9,CEBPG,FGF13,HAND2,AKT1,EGR2,ZHX2,ALAS1,PPP3CA,E2F4,TFDP1,CREBBP,PFDN5,TCF3,RNF17,ACVR1B,ROCK1,EAPP,GRAP2,SYK,GABPA                |
| BPA_4500µg | 8.0%<br>(10/125)  | ROCK1,IGF2,EGR2,DNMT3A,HELLS,TGFB2,HBE1,HRAS,RNF17,TCF3                                                                                                                          |

### **Cellular Growth and Proliferation**

|            |                   |                                                                                                                               |
|------------|-------------------|-------------------------------------------------------------------------------------------------------------------------------|
| BPA_500µg  | 7.9%<br>(8/101)   | RUNX3,CDH2,CDC2L5,AXIN1,BDNF,FGF8,CYSLTR1,PPP3CA                                                                              |
| BPA_1500µg | 13.1%<br>(22/168) | BDNF,PTHLH,CDC7,FGF8,DNAJC3,HRAS,NKX2-3,SLIT2,TCF3,FGF13,PTK2,EAPP,AKT1,CDH5,GRAP2,EFNB1,PIK3CG,SYK,CYP2J2,COL9A2,DPH1,PPP3CA |

|            |                   |                                                                                      |
|------------|-------------------|--------------------------------------------------------------------------------------|
| BPA_4500µg | 12.0%<br>(15/125) | AXIN1,CDC7,HRAS,SLIT2,TCF3,IGF2,EGR2,PTPRO,EFNB1,CYSLTR1,CYR61,DPH1,TOX,ITGB5,PPP3CA |
|------------|-------------------|--------------------------------------------------------------------------------------|

### **Cell-To-Cell Signaling and Interaction**

|            |                   |                                                                                              |
|------------|-------------------|----------------------------------------------------------------------------------------------|
| BPA_500µg  | 15.8%<br>(16/101) | YWHAG,NCKIPSD,TJP2,BDNF,DDEF1,ADIPOR1,TGM2,CDH2,CLDN4,RND3,SYK,PIK3CG,RHOA,KCNJ1,GABPA,CPEB1 |
| BPA_1500µg | 9.5%<br>(16/168)  | APOE,GRIN1,GEM,BDNF,RRAD,PTHLH,HRAS,SLIT2,LRPAP1,PTK2,YES1,AKT1,CDH5,SYK,EFNB1,GABPA         |
| BPA_4500µg | 10.4%<br>(13/125) | APOE,NCDN,YWHAG,GEM,RRAD,HRAS,PTK2,IGF2,RND3,JAM3,EFNB1,GABPA,ITGB5                          |

### **Cellular Compromise**

|            |                   |                                                                            |
|------------|-------------------|----------------------------------------------------------------------------|
| BPA_500µg  | 7.9%<br>(8/101)   | CASP6,CDH2,NDRG1,BDNF,SUPT16H,RHOA,SET,CEBPG                               |
| BPA_1500µg | 7.7%<br>(13/168)  | DENND2D,GEM,NDRG1,RRAD,BDNF,HRAS,SET,CEBPG,ROCK1,PTK2,TGM1,EFNB1,MID1IP1   |
| BPA_4500µg | 10.4%<br>(13/125) | DENND2D,APOE,GEM,STMN2,NDRG1,RRAD,HRAS,ROCK1,PTK2,TGM1,EFNB1,MAP1A,MID1IP1 |

### **Cellular Function and Maintenance**

|            |                   |                                                                          |
|------------|-------------------|--------------------------------------------------------------------------|
| BPA_500µg  | 9.9%<br>(10/101)  | NCKIPSD,BDNF,SYK,RHOA,SYPL2,CHERP,KCNJ1,PGM1,NUCB2,ACTG1                 |
| BPA_1500µg | 6.%<br>(10/168)   | PTK2,APOE,YES1,NCKIPSD,AKT1,CDH5,BDNF,SYK,TBXAS1,ACTG1                   |
| BPA_4500µg | 10.4%<br>(13/125) | APOE,MYH6,PKD2,CHERP,PGM1,ACTG1,PTK2,IGF2,PTPRO,EFNB1,NUCB2,CFLAR,TBXAS1 |

### **Molecular Transport**

|            |                   |                                                                                                        |
|------------|-------------------|--------------------------------------------------------------------------------------------------------|
| BPA_500µg  | 8.9%<br>(9/101)   | SLC20A1,PARK7,BDNF,USF2,KCNJ1,ACAT1,CYSLTR1,SLC27A1,SLC34A2                                            |
| BPA_1500µg | 10.1%<br>(17/168) | APOE,ZNF384,KPNA6,RRAD,FOXA1,PPP1R3C,PTHLH,RAN,NUP214,HRAS,LRPAP1,ROCK1,AKT1,SORT1,SLC27A1,IRS2,PPP3CA |

|            |                   |                                                                                                          |
|------------|-------------------|----------------------------------------------------------------------------------------------------------|
| BPA_4500µg | 13.6%<br>(17/125) | SLC20A1,APOE,APOB,ZNF384,PPARD,RRAD,PPP1R3C,RAN,HEXA,HRAS,SLC34A2,ADIPOR1,ROCK1,PTK2,PARK7,CYSLTR1,SORT1 |
|------------|-------------------|----------------------------------------------------------------------------------------------------------|

#### **Lipid Metabolism**

|            |                  |                                                                                             |
|------------|------------------|---------------------------------------------------------------------------------------------|
| BPA_500µg  | 7.9%<br>(8/101)  | EBP,SLC27A2,BDNF,SYK,PIK3CG,ACAT1,CYSLTR1,SLC27A1                                           |
| BPA_1500µg | 8.9%<br>(15/168) | APOE,NSDHL,BDNF,RRAD,FOXA1,PPP1R3C,PTHLH,HRAS,LRPAP1,AKT1,IRS2,SERPINA1,SLC27A1,TBXAS1,NPC2 |
| BPA_4500µg | 9.6%<br>(12/125) | APOE,APOB,RRAD,PPARD,PPP1R3C,OXCT1,CYSLTR1,HRAS,HEXA,SERPINA1,TBXAS1,ADIPOR1                |

#### **DNA Replication, Recombination, and Repair**

|            |                 |                                                     |
|------------|-----------------|-----------------------------------------------------|
| BPA_500µg  | 5.9%<br>(6/101) | TGM2,RND3,RHOA,XRN2,MRE11A,SPO11                    |
| BPA_1500µg | 5.4%<br>(9/168) | DYNC1LI1,NDRG1,HELLS,NDE1,UPP1,CDC7,RAN,ERCC5,SPO11 |
| BPA_4500µg | 6.4%<br>(8/125) | IGF2,NDRG1,DNMT3A,HELLS,XRN2,UPP1,CDC7,RAN          |

---
