# Supplementary material for: Toxicogenomic and Phenotypic Analyses of Bisphenol-A Early-Life Exposure Toxicity in Zebrafish
Source: PubMed Central journal article supplement (PMC3237442; doi:10.1371/journal.pone.0028273), 2011-12-14
Supplement: pone.0028273.s005.pdf [file pone.0028273.s005.pdf]

**Table S3.** Selected top functional subcategories of 'Physiological system development and function' that are significantly enriched with human homologs of zebrafish genes deregulated by 500 µg/L, 1500 µg/L and 4500 µg/L of BPA. The data was generated using Ingenuity Pathway Analysis™ software and only subcategories associated with specific organ-system with  $P < 0.05$  (Fisher's Exact Test) and having greater than 5% of homologs enriched in all three treatment groups are listed.

| Functional Subcategories                   | Percentage (no. molecules enriched / no. molecules used in analysis) | Molecules (human homologs of zebrafish genes) used in the analysis                                                                                                     |
|--------------------------------------------|----------------------------------------------------------------------|------------------------------------------------------------------------------------------------------------------------------------------------------------------------|
| <b><u>Nervous System</u></b>               |                                                                      |                                                                                                                                                                        |
| BPA_500µg                                  | 17.8%<br>(18/101)                                                    | RUNX3,YWHAG,BDNF,FGF8,SP4,PHOX2A,CDH2,TIAM2,EGR2,PARK7,RHOA,KCNJ1,CYSLTR1,GABPA,CPEB1,PPP3CA,PITX3,DYRK1A                                                              |
| BPA_1500µg                                 | 16.1%<br>(27/168)                                                    | POU3F1,APOE,LHX5,CUL5,GEM,BDNF,FGF8,HRAS,POU3F2,LRPAP1,PTK2,EGR2,AKT1,EFNB1,GFAP,SORT1,PPP3CA,GRIN1,RRAD,CREBBP,SLIT2,SP4,ROCK1,TIAM2,NDE1,RTN4,GABPA                  |
| BPA_4500µg                                 | 23.2%<br>(29/125)                                                    | APOE,GEM,NCDN,APOB,STMN2,ZNF384,HRAS,EXT1,MPPED2,PRPS1,EGR2,EFNB1,TGFB2,GFAP,ITGB5,PPP3CA,THBS4,YWHAG,RRAD,CHERP,SLIT2,SP4,ROCK1,IGF2,NRCAM,RTN4,GABPA,TNFRSF19,DYRK1A |
| <b><u>Skeletal and Muscular System</u></b> |                                                                      |                                                                                                                                                                        |
| BPA_500µg                                  | 14.9%<br>(15/101)                                                    | NCKIPSD,YWHAG,FGF8,MYH11,ACTG1,MYLK,TGM2,CDH2,CAMK2D,GAB1,RHOA,SYPL2,MYL4,GABPA,ACTA1                                                                                  |
| BPA_1500µg                                 | 6.0%<br>(10/168)                                                     | PTK2,APOE,NCKIPSD,AKT1,GAB1,PTHLH,FGF8,GABPA,SLIT2,ACTG1                                                                                                               |
| BPA_4500µg                                 | 12.0%<br>(15/125)                                                    | APOE,MYH6,YWHAG,MEOX1,MYH11,SLIT2,ACTG1,SPRED2,PTK2,IGF2,HCN2,SP8,BHLHB2,TGFB2,GABPA                                                                                   |
| <b><u>Hematological System</u></b>         |                                                                      |                                                                                                                                                                        |
| BPA_500µg                                  | 13.9%<br>(14/101)                                                    | BLNK,RUNX3,E2F4,CDC2L5,BDNF,MYH11,CD74,SCYE1,MYLK,EGR2,SYK,PIK3CG,RHOA,CYSLTR1                                                                                         |
| BPA_1500µg                                 | 9.5%<br>(16/168)                                                     | BLNK,APOE,BDNF,PTHLH,HRAS,NKX2-3,CD74,TCF3,SCYE1,PTK2,AKT1,EGR2,GRAP2,SYK,EFNB1,PIK3CG                                                                                 |

BPA\_4500µg 6.4%  
(8/125) PTK2,APOE,PTPRO,HRAS,CYSLTR1,CFLAR,TCF3,TOX

**Cardiovascular System**

BPA\_500µg 7.9%  
(8/101) CDH2,CAMK2D,GAB1,BDNF,PIK3CG,RHOA,FGF8,SCYE1

BPA\_1500µg 7.7%  
(13/168) APOE,BDNF,PTHLH,HYOU1,FGF8,SCYE1,PTK2,AKT1,CAMK2D,CDH5,GAB1,EFNB1,CFB

BPA\_4500µg 10.4%  
(13/125) APOE,APOB,HYOU1,SPRED2,PTK2,IGF2,HCN2,EFNB1,CFB,RTN4,TGFB2,CYR61,CAV2

**Reproductive System**

BPA\_500µg 6.9%  
(7/101) NDRG1,GAB1,AXIN1,USF2,SOX3,RHOA,SPO11

BPA\_1500µg 6.5%  
(11/168) PTK2,DENND2D,AQP3,TGM1,NDRG1,AXIN1,PTHLH,FGF8,HOXB9,IRS2,SPO11

BPA\_4500µg 7.2%  
(9/125) PTK2,DENND2D,IGF2,TGM1,NDRG1,EHMT2,HRAS,RNF17,FNDC3A

---
