# Supplementary material for: Toxicogenomic and Phenotypic Analyses of Bisphenol-A Early-Life Exposure Toxicity in Zebrafish
Source: PubMed Central journal article supplement (PMC3237442; doi:10.1371/journal.pone.0028273), 2011-12-14
Supplement: pone.0028273.s006.pdf [file pone.0028273.s006.pdf]

**Table S4.** Selected top subcategories of 'Disease and disorder' that were significantly enriched with human homologs of zebrafish genes deregulated by 500 µg/L, 1500 µg/L and 4500 µg/L of BPA. The data was generated using Ingenuity Pathway Analysis™ software and only subcategories with  $P < 0.05$  and having greater 5% of homologs enriched in at least two treatment groups are listed here.

| Description                 | P-value (Fisher Exact Test) | Percentage (no. molecules enriched / no. molecules used in analysis) | Molecules (human homologs of zebrafish genes) used in the analysis                                                                                                                                                                                                                                                                                                                                                                                                                                                                                                             |
|-----------------------------|-----------------------------|----------------------------------------------------------------------|--------------------------------------------------------------------------------------------------------------------------------------------------------------------------------------------------------------------------------------------------------------------------------------------------------------------------------------------------------------------------------------------------------------------------------------------------------------------------------------------------------------------------------------------------------------------------------|
| <b>Cancer</b>               |                             |                                                                      |                                                                                                                                                                                                                                                                                                                                                                                                                                                                                                                                                                                |
| BPA_500µg                   | 5.89E-04 to 3.6E-02         | 50.5% (51/101)                                                       | SLC27A2,ZNF384,AXIN1,NDRG2,CALCOCO2,CCNB2,MYH11,SCYE1,SET,MYLK,CD2AP,PIK3CG,BCKDHA,E2F4,YWHAG,NDRG1,MFAP5,CDH2,EBP,SDCBP,GAB1,RND3,RHOA,SYK,BLNK,MYCL1,PA2G4,SRPX,BDNF,USF2,FGF8,FIP1L1,MRE11A,CD74,ACOT7,SERPIND1,CSNK1E,CLDN4,PARK7,MAD2L1BP,SSR2,PPP3CA,RUNX3,ETFA,DDEF1,GABBR1,SLC34A2,DNAJB9,ACTG1,ACAT1,CYSLTR1                                                                                                                                                                                                                                                          |
| BPA_1500µg                  | 3.4E-04 to 2.45E-02         | 55.4% (93/168)                                                       | ZNF384,SLC27A2,AXIN1,KRT7,PTHLH,CDC7,RAN,DNAJC3,HRAS,CCNB2,KIAA0746,CDK9,LRPAP1,SCYE1,SET,FRAG1,PTK2,CAMK2D,CDK8,BCKDHA,PIK3CG,PRKAA1,IRS2,E2F4,NDRG1,TFDP1,MLLT10,RRAD,ACTR10,CREBBP,COL2A1,PFDN5,RNF17,TCF3,PFKM,HSPA8,EAPP,PPP1R13L,CDH5,GAB1,RND3,SYK,ALDOA,TBXAS1,VIL1,BLNK,APOE,GEM,MYCL1,SRPX,BDNF,NID2,PPP1R3C,FGF8,HYOU1,FIP1L1,NUP214,CD74,FGF13,CSNK1E,COL1A2,AQP3,YES1,AKT1,CLDN4,MAD2L1BP,PDCD2L,EFNB1,CFB,ALAS1,SSR2,SORT1,SERPINA1,GBP2,DPH1,PPP3CA,GRIN1,NUDCD3,SERTAD2,ANKRD9,PTP4A2,KHK,ETFA,UPP1,RQCD1,SLIT2,SLC34A2,DNAJB9,CCDC6,ACTG1,ROCK1,EIF4A1,CYP2J2 |
| BPA_4500µg                  | 2.6E-05 to 3.13E-02         | 66.4% (83/125)                                                       | EPS8,ZNF384,NDRG2,AXIN1,KRT7,DIAPH3,RAN,CDC7,SFPQ,HRAS,MYH11,FRAG1,PTK2,EGR2,PTPRO,TTC5,ITGB5,CCNL2,YWHAG,TFDP1,NDRG1,STK39,RRAD,MEOX1,RPA1,RNF17,TCF3,ACVR1B,FLCN,IGF2,TGM1,PPP1R13L,SDCBP,NRCAM,RND3,JAM3,BHLHB2,CALB2,RTN4,GOLGA5,CFLAR,CYR61,TBXAS1,VIL1,BLNK,APOE,GEM,SRPX,STMN2,PA2G4,NID2,MXRA8,PPP1R3C,PKD2,HYOU1,FIP1L1,EXT1,SETX,CD74,PROM1,SERPIND1,PARK7,EFNB1,TGFB2,CFB,SSR2,SORT1,SERPINA1,PIK3R2,DPH1,PPP3CA,ETFA,PPARD,UPP1,TUBA4A,SLC34A2,EPHA3,SLIT2,ACTG1,ROCK1,GABPA,CYSLTR1,DYRK1A                                                                        |
| <b>Neurological Disease</b> |                             |                                                                      |                                                                                                                                                                                                                                                                                                                                                                                                                                                                                                                                                                                |
| BPA_500µg                   | 9.59E-03 to 2.97E-02        | 9.9% (10/101)                                                        | TGM2,RUNX3,PRPS1,EGR2,NDRG1,PARK7,BDNF,FGF8,ACAT1,GABBR1                                                                                                                                                                                                                                                                                                                                                                                                                                                                                                                       |
| BPA_1500µg                  | 3.4E-04 to 2.51E-02         | 10.7% (18/168)                                                       | GRIN1,POU3F1,APOE,GEM,MAGT1,BDNF,RRAD,VPS33A,CREBBP,HYOU1,FGF8,HRAS,SETX,LRPAP1,CASP6,SOX3,EFNB1,JARID1C                                                                                                                                                                                                                                                                                                                                                                                                                                                                       |

|            |                         |                |                                                                                       |
|------------|-------------------------|----------------|---------------------------------------------------------------------------------------|
| BPA_4500µg | 2.48E-04 to<br>3.13E-02 | 12.8% (16/125) | APOE,APOB,GEM,NDRG1,RRAD,UPP1,HRAS,SETX,IGF2,PPP1R13L,EGR2,PARK7,EFNB1,SP8,GFAP,CFLAR |
|------------|-------------------------|----------------|---------------------------------------------------------------------------------------|

**Connective Tissue Disorders**

|           |                     |                |                                                                                             |
|-----------|---------------------|----------------|---------------------------------------------------------------------------------------------|
| BPA_500µg | 1E-02<br>to1.99E-02 | 15.8% (16/101) | BLNK,RUNX3,BDNF,FIP1L1,SLC34A2,CD74,ADIPOR1,TGM2,EBP,EGR2,PRPS1,CD68,GAB1,RHOA,ACTA1,PPP3CA |
|-----------|---------------------|----------------|---------------------------------------------------------------------------------------------|

|            |                         |               |                                                                                                                                                                                                          |
|------------|-------------------------|---------------|----------------------------------------------------------------------------------------------------------------------------------------------------------------------------------------------------------|
| BPA_1500µg | 6.31E-04 to<br>1.85E-02 | 20.% (35/168) | BLNK,APOE,GEM,MYCL1,BDNF,PTHLH,HRAS,FIP1L1,CD74,CDK9,LDHB,PTK2,COL1A2,PRPS1,EGR2,AKT1,BCKDHA,CFB,ACTA1,PPP3CA,GRIN1,NONO,USP15,COL2A1,SLC34A2,RNF17,DEDD2,ROCK1,HSPA8,RND3,GAB1,CD68,UQCRC2,ALDOA,COL9A2 |
|------------|-------------------------|---------------|----------------------------------------------------------------------------------------------------------------------------------------------------------------------------------------------------------|

|            |                        |              |                                       |
|------------|------------------------|--------------|---------------------------------------|
| BPA_4500µg | 2.6E-05 to<br>3.13E-02 | 5.6% (7/125) | ROCK1,PTK2,GEM,RND3,NRCAM,HRAS,SPRED2 |
|------------|------------------------|--------------|---------------------------------------|

**Cardiovascular Disease**

|           |                         |              |                                        |
|-----------|-------------------------|--------------|----------------------------------------|
| BPA_500µg | 5.89E-04 to<br>2.97E-02 | 6.9% (7/101) | BDNF,PIK3CG,SYK,RHOA,FGF8,SERPIND1,SP4 |
|-----------|-------------------------|--------------|----------------------------------------|

|            |                         |              |                                     |
|------------|-------------------------|--------------|-------------------------------------|
| BPA_1500µg | 1.31E-02 to<br>1.85E-02 | 4.2% (7/168) | APOE,GRIN1,AKT1,BDNF,PIK3CG,CFB,SP4 |
|------------|-------------------------|--------------|-------------------------------------|

|            |                         |              |                                                    |
|------------|-------------------------|--------------|----------------------------------------------------|
| BPA_4500µg | 7.68E-04 to<br>3.13E-02 | 7.2% (9/125) | APOE,IGF2,MYH6,APOB,PPARD,CFB,CYSLTR1,SERPIND1,SP4 |
|------------|-------------------------|--------------|----------------------------------------------------|

**Reproductive System Disease**

|           |                        |              |                                          |
|-----------|------------------------|--------------|------------------------------------------|
| BPA_500µg | 4.56E-03 to<br>3.6E-02 | 6.9% (7/101) | CD2AP,SDCBP,DDEF1,MAD2L1BP,SYK,RHOA,FGF8 |
|-----------|------------------------|--------------|------------------------------------------|

|            |                         |               |                                                                              |
|------------|-------------------------|---------------|------------------------------------------------------------------------------|
| BPA_1500µg | 2.42E-03 to<br>2.09E-02 | 7.7% (13/168) | DENND2D,AXIN1,PTHLH,FGF8,HRAS,SLIT2,TCF3,LRPAP1,FGF13,PTK2,AKT1,SYK,SERPINA1 |
|------------|-------------------------|---------------|------------------------------------------------------------------------------|

|            |                         |              |                                                                                                                   |
|------------|-------------------------|--------------|-------------------------------------------------------------------------------------------------------------------|
| BPA_4500µg | 2.92E-04 to<br>3.13E-02 | 16% (20/125) | DENND2D,APOE,KRT7,MXRA8,TUBA4A,MEOX1,HRAS,RPA1,SLIT2,CD74,PROM1,PTK2,IGF2,BHLHB2,CALB2,CFB,SORT1,CYR61,DPH1,ITGB5 |
|------------|-------------------------|--------------|-------------------------------------------------------------------------------------------------------------------|

**Gastrointestinal Disease**

|           |                      |               |                                                           |
|-----------|----------------------|---------------|-----------------------------------------------------------|
| BPA_500µg | 1E-02 to<br>3.43E-02 | 9.9% (10/101) | RUNX3,EBP,SLC27A2,CLDN4,NDRG1,FGF8,CCNB2,DNAJB9,ACOT7,SET |
|-----------|----------------------|---------------|-----------------------------------------------------------|

|            |                        |                |                                                                                                                                                        |
|------------|------------------------|----------------|--------------------------------------------------------------------------------------------------------------------------------------------------------|
| BPA_1500µg | 1.99E-03<br>to1.85E-02 | 14.9% (25/168) | APOE,SLC27A2,SRPX,FGF8,CCNB2,HRAS,KIAA0746,SET,COL1A2,AQP3,YES1,AKT1,CLDN4,PIK3CG,EFNB1,LAS1,SERTAD2,ANKRD9,TFDP1,NDRG1,RRAD,COL2A1,SLIT2,DNAJB9,HSPA8 |
|------------|------------------------|----------------|--------------------------------------------------------------------------------------------------------------------------------------------------------|

BPA\_4500µg 1.58E-02 to 2.5E-02 8.0% (10/125) YWHAG,NDRG1,KRT7,AXIN1,TUBA4A,HRAS,CD74,SLIT2,CYR61,ACTG1

#### **Genetic Disorder**

BPA\_500µg 1E-02 to 2.97E-02 9.9% (10/101) EBP,TJP2,PRPS1,EGR2,PARK7,KCNJ1,CYB5R1,MRE11A,ACTA1,HMBS

BPA\_1500µg 1.99E-03 to 1.91E-02 8.3% (14/168) APOE,NSDHL,MAGT1,KRT17,PTHLH,COL2A1,SETX,PFKM,EFNB1,SOX3,ERCC5,JARID1C,ACTA1,NPC2

BPA\_4500µg 1.58E-02 to 3.13E-02 11.2% (14/125) APOE,APOB,PKD2,CYB5R1,EXT1,HRAS,SETX,FLCN,EGR2,PARK7,EFNB1,GFAP,CTH,TBXAS1

#### **Skeletal and Muscular Disorders**

BPA\_500µg 1E-02 to 2.97E-02 4.0% (4/101) RUNX3,EBP,BDNF,ACTA1

BPA\_1500µg 1.99E-03 to 1.85E-02 13.7% (23/168) BLNK,APOE,GRIN1,NONO,USP15,BDNF,PTHLH,COL2A1,FIP1L1,CD74,CDK9,DEDD2,LDHB,HSPA8,EGR2,PRP S1,CD68,UQCRC2,CFB,ALDOA,COL9A2,PPP3CA,ACTA1

BPA\_4500µg 1.27E-02 to 3.13E-02 5.6% (7/125) IGF2,PPP1R13L,AXIN1,BHLHB2,TTC5,CFLAR,TBXAS1

#### **Hematological Disease**

BPA\_500µg 1E-02 to 2.97E-02 5.9% (6/101) BLNK,BDNF,RHOA,PIK3CG,SYK,CYB5R1

BPA\_1500µg 6.48E-03 to 2.05E-02 8.9% (15/168) BLNK,E2F4,MLLT10,BDNF,CREBBP,NUP214,CD74,CDK9,TCF3,YES1,CDK8,AKT1,PIK3CG,SYK,PPP3CA

BPA\_4500µg 4.94E-03 to 3.13E-02 4.8% (6/125) BLNK,APOE,APOB,CYB5R1,TCF3,SPRED2

---
