# Supplementary material for: Toxicogenomic and Phenotypic Analyses of Bisphenol-A Early-Life Exposure Toxicity in Zebrafish
Source: PubMed Central journal article supplement (PMC3237442; doi:10.1371/journal.pone.0028273), 2011-12-14
Supplement: pone.0028273.s007.pdf [file pone.0028273.s007.pdf]

**Table S5.** Selected top functional subcategories of 'Canonical Pathways' that are significantly enriched with human homologs of zebrafish genes deregulated by 500 µg/L, 1500 µg/L and 4500 µg/L of BPA. The data was generated using Ingenuity Pathway Analysis™ software and only subcategories with  $P < 0.05$  (Fisher's Exact Test) and having at least 4% of homologs enriched in two treatment groups are listed.

| <b>Functional Subcategories</b>                       | <b>Percentage (no. molecules enriched / no. molecules used in analysis)</b> | <b>Molecules (human homologs of zebrafish genes) used in the analysis</b> |
|-------------------------------------------------------|-----------------------------------------------------------------------------|---------------------------------------------------------------------------|
| <b><u>Tight Junction Signaling</u></b>                |                                                                             |                                                                           |
| BPA_500µg                                             | 7.9% (8/101)                                                                | MYLK, TJP2, CLDN4, RHOA, MYL4, MYH11, ACTG1, ACTA1                        |
| BPA_1500µg                                            | 3% (5/168)                                                                  | AKT1, CLDN4, PPP2R2A, ACTG1, ACTA1                                        |
| BPA_4500µg                                            | 4.8% (6/125)                                                                | MYH6, JAM3, TGFB2, MYL4, MYH11, ACTG1                                     |
| <b><u>Actin Cytoskeleton Signaling</u></b>            |                                                                             |                                                                           |
| BPA_500µg                                             | 8.9% (9/101)                                                                | MYLK, TIAM2, PIK3CG, RHOA, FGF8, MYL4, MYH11, ACTG1, ACTA1                |
| BPA_1500µg                                            | 5.4% (9/168)                                                                | PTK2, ROCK1, TIAM2, PIK3CG, FGF8, HRAS, ACTG1, ACTA1, FGF13               |
| BPA_4500µg                                            | 7.2% (9/125)                                                                | PTK2, ROCK1, MYH6, DIAPH3, MYL4, HRAS, MYH11, PIK3R2, ACTG1               |
| <b><u>Integrin Signaling</u></b>                      |                                                                             |                                                                           |
| BPA_500µg                                             | 7.9% (8/101)                                                                | MYLK, TSPAN3, RND3, ASAP1, PIK3CG, RHOA, ACTG1, ACTA1                     |
| BPA_1500µg                                            | 5.4% (9/168)                                                                | PTK2, ROCK1, AKT1, RND3, PIK3CG, TSPAN2, HRAS, ACTG1, ACTA1               |
| BPA_4500µg                                            | 7.2% (9/125)                                                                | PTK2, ROCK1, TSPAN3, RND3, HRAS, CAPN2, PIK3R2, ACTG1, ITGB5              |
| <b><u>B Cell Receptor Signaling</u></b>               |                                                                             |                                                                           |
| BPA_500µg                                             | 5.9% (6/101)                                                                | BLNK, CAMK2D, GAB1, PIK3CG, SYK, PPP3CA                                   |
| BPA_1500µg                                            | 4.8% (8/168)                                                                | BLNK, AKT1, CAMK2D, GAB1, PIK3CG, SYK, HRAS, PPP3CA                       |
| BPA_4500µg                                            | 4.8% (6/125)                                                                | BLNK, CAMK2D, HRAS, PIK3R2, PPP3CA, CALM1                                 |
| <b><u>NRF2-mediated Oxidative Stress Response</u></b> |                                                                             |                                                                           |
| BPA_500µg                                             | 5% (5/101)                                                                  | PIK3CG, DNAJB9, ACTG1, ACTA1, DNAJC11                                     |
| BPA_1500µg                                            | 6% (10/168)                                                                 | AKT1, PIK3CG, CREBBP, DNAJC3, HRAS, DNAJC10, DNAJB9, ACTG1, DNAJB5, ACTA1 |
| BPA_4500µg                                            | 4.8% (6/125)                                                                | DNAJC18, HRAS, DNAJC10, PIK3R2, ACTG1, DNAJB5                             |
| <b><u>Ephrin Receptor Signaling</u></b>               |                                                                             |                                                                           |
| BPA_500µg                                             | 4% (4/101)                                                                  | SDCBP, AXIN1, PIK3CG, RHOA                                                |
| BPA_1500µg                                            | 5.4% (9/168)                                                                | PTK2, ROCK1, GRIN1, GNB4, AKT1, AXIN1, PIK3CG, EFNB1, HRAS                |

BPA\_4500µg 6.4% (8/125) PTK2, ROCK1, GNB4, SDCBP, AXIN1, EFNB1, HRAS, EPHA3

#### **Axonal Guidance Signaling**

BPA\_500µg 6.9% (7/101) WNT8A, SDCBP, BDNF, PIK3CG, RHOA, MYL4, PPP3CA

BPA\_1500µg 6.5% (11/168) PTK2, ROCK1, GNB4, AKT1, BDNF, PIK3CG, EFNB1, RTN4, HRAS, SLIT2, PPP3CA

BPA\_4500µg 10.4% (13/125) HRAS, SLIT2, EPHA3, PTK2, ROCK1, GNB4, MICAL1, SDCBP, EFNB1, RTN4, MYL4, PIK3R2, PPP3CA

#### **VEGF Signaling**

BPA\_500µg 3% (3/101) PIK3CG, ACTG1, ACTA1

BPA\_1500µg 4.2% (7/168) PTK2, ROCK1, AKT1, PIK3CG, HRAS, ACTG1, ACTA1

BPA\_4500µg 4% (5/125) PTK2, ROCK1, HRAS, PIK3R2, ACTG1

#### **Clathrin-mediated Endocytosis**

BPA\_500µg 5.9% (6/101) CD2AP, PIK3CG, FGF8, ACTG1, ACTA1, PPP3CA

BPA\_1500µg 4.2% (7/168) HSPA8, PIK3CG, FGF8, ACTG1, ACTA1, PPP3CA, FGF13

BPA\_4500µg 3.2% (4/125) PIK3R2, ACTG1, ITGB5, PPP3CA

#### **Synaptic Long Term Potentiation**

BPA\_500µg 2% (2/101) CAMK2D, PPP3CA

BPA\_1500µg 4% (6/168) GRIN1, CAMK2D, PPP1R3C, CREBBP, HRAS, PPP3CA

BPA\_4500µg 4% (5/125) CAMK2D, PPP1R3C, HRAS, PPP3CA, CALM1

#### **Glycolysis/Gluconeogenesis**

BPA\_500µg 3% (3/101) ADH6, HK1, PGM1

BPA\_1500µg 4% (6/168) ADH6, C10ORF134, ENO3, ALDOA, LDHB, PFKM

BPA\_4500µg 4% (5/125) ADH6, C10ORF134, ENO3, PGM1, LDHB

---
