# Supplementary material for: Toxicogenomic and Phenotypic Analyses of Bisphenol-A Early-Life Exposure Toxicity in Zebrafish
Source: PubMed Central journal article supplement (PMC3237442; doi:10.1371/journal.pone.0028273), 2011-12-14
Supplement: pone.0028273.s008.pdf [file pone.0028273.s008.pdf]

**Table S6.** Human homolog of zebrafish genes (14) that were significantly deregulated in all three BPA exposed groups (500 µg/L, 1500 µg/L and 4500 µg/L) and has been reported to be endocrine-regulated. References below table.

| Gene Symbol [Description]                                             | Function                | Endocrine-regulated                                                        |
|-----------------------------------------------------------------------|-------------------------|----------------------------------------------------------------------------|
| ZNF384 [zinc finger protein 384; CIZ/Nmp4]                            | transcription regulator | Parathyroid (Alvarez et al. 2005; Shah et al. 2004)                        |
| EGR2 [early growth response 2; Krox20]                                | transcription regulator | E2 (Pedram et al. 2007)                                                    |
| SP4 [specificity protein 4]                                           | transcription regulator | E2 (Pedram et al. 2007)                                                    |
| GABPA [GA binding protein transcription factor, alpha subunit; NRF2a] | transcription regulator | Thyroid (Rodríguez-Peña et al. 2002) and E2 (Rodríguez-Cuenca et al. 2007) |
| RND3 [Rho family GTPase 3]                                            | enzyme (GTPase)         | E2 (Bektic et al. 2004)                                                    |
| BLNK [B-cell linker]                                                  | signal transducer       | E2 (Frasor et al., 2004)                                                   |
| HSD17B8 [hydroxysteroid (17-beta) dehydrogenase 8]                    | enzyme (metabolic)      | E2 and E2 metabolism (Rotinen et al. 2009)                                 |
| LRRC4 [leucine rich repeat containing 4]                              | others                  | Antithyroid (Propylthiouracil) (Dong et al. 2007)                          |
| CPA2 [carboxypeptidase A2 (pancreatic)]                               | enzyme (peptidase)      | E2 (Pedram et al. 2007)                                                    |
| SLC34A2 [solute carrier family 34, member 2; NAPI2]                   | transporter             | E2 (Xu et al. 2003) and Thyroid (Alcalde et al. 1999)                      |
| NDRG1 [N-myc downstream regulated 1]                                  | enzyme (kinase)         | E2 (Frasor et al., 2004)                                                   |
| SSR2 [signal sequence receptor, beta]                                 | others                  | E2 (Ivanga et al. 2007)                                                    |
| ACADM [acyl-Coenzyme A dehydrogenase; MCAD]                           | enzyme (metabolic)      | E2 (Ivanga et al. 2007)                                                    |

#### Reference

- Alcalde AI, Sarasa M, Raldúa D, Aramayona J, Morales R, Biber J, et al. 1999. Role of thyroid hormone in regulation of renal phosphate transport in young and aged rats. *Endocrinology* 140:1544-1551.
- Alvarez M, Shah R, Rhodes SJ, Bidwell JP. 2005. Two promoters control the mouse *Nmp4/CIZ* transcription factor gene. *Gene*. 347:43-54.
- Bektic J, Wrulich OA, Dobler G, Kofler K, Ueberall F, Culig Z, et al. 2004. Identification of genes involved in estrogenic action in the human prostate using microarray analysis. *Genomics* 83:34-44.
- Dong H, Yauk CL, Williams A, Lee A, Douglas GR, Wade MG. 2007. Hepatic gene expression changes in hypothyroid juvenile mice: characterization of a novel negative thyroid-responsive element. *Endocrinology* 148:3932-3940.
- Frasor J, Stossi F, Danes JM, Komm B, Lyttle CR, Katzenellenbogen BS. 2004. Selective estrogen receptor modulators: discrimination of agonistic versus antagonistic activities by gene expression profiling in breast cancer cells. *Cancer Res* 64:1522-1533.
- Ivanga M, Labrie Y, Calvo E, Belleau P, Martel C, Luu-The V, et al. 2007. Temporal analysis of E2 transcriptional induction of PTP and MKP and downregulation of IGF-I pathway key components in the mouse uterus. *Physiol Genomics* 29:13-23.
- Pedram A, Razandi M, Aitkenhead M, Hughes CC, Levin ER. 2002. Integration of the non-genomic and genomic actions of estrogen: membrane-initiated signaling by steroid to transcription and cell biology. *J Biol Chem* 277:50768-50775.
- Rodríguez-Peña A, Escrivá H, Handler AC, Vallejo CG. 2002. Thyroid hormone increases transcription of GA-binding protein/nuclear respiratory factor-2 alpha-subunit in rat liver. *FEBS Lett* 514:309-314.
- Rodríguez-Cuenca S, Monjo M, Gianotti M, Proenza AM, Roca P. 2007. Expression of mitochondrial biogenesis-signaling factors in brown adipocytes is influenced specifically by 17beta-estradiol, testosterone, and progesterone. *Am J Physiol Endocrinol Metab* 292:E340-346.
- Rotinen M, Celay J, Alonso MM, Arrazola A, Encio I, Villar J. 2009. Estradiol induces type 8 17beta-hydroxysteroid dehydrogenase expression: crosstalk between estrogen receptor alpha and C/EBPbeta. *J Endocrinol* 200:85-92.

Shah R, Alvarez M, Jones DR, Torrungruang K, Watt AJ, Selvamurugan N, et al. 2004. Nmp4/CIZ regulation of matrix metalloproteinase 13 (MMP-13) response to parathyroid hormone in osteoblasts. *Am J Physiol Endocrinol Metab* 287:E289-96.

Xu H, Uno JK, Inouye M, Xu L, Drees JB, Collins JF, et al. 2003. Regulation of intestinal NaPi-IIb cotransporter gene expression by estrogen. *Am J Physiol Gastrointest Liver Physiol* 285:G1317-1324.
